# Supplementary material for: Chronic Granulomatous Disease and Myelodysplastic Syndrome in a Patient with a Novel Mutation in CYBB
Source: MDPI journal article supplement (doi:10.3390/genes12101476), 2021-09-23
Supplement: s1 [file s1]

## Supplementary material

**Table S1.** List of 67 genes related to MDS available at Human Phenotype Ontology (diseases included: Fanconi anemia, Primary MDS/AML, Thrombocytopenia 2, Thrombocytopenia 5, Familial aplastic anemia, Shwachman-Diamond syndrome, Diamond Blackfan anemia, Congenital neutropenia, Familial platelet disorder, Myeloid neoplasms with germline predisposition)

|         |        |        |
|---------|--------|--------|
| ADA2    | FANCL  | RPS10  |
| ANKRD26 | FANCM  | RPS15A |
| ATG2B   | FLT3   | RPS17  |
| BRCA1   | GATA1  | RPS19  |
| BRCA2   | GATA2  | RPS24  |
| BRIP1   | GFI1   | RPS26  |
| CTNNA1  | GSKIP  | RPS27  |
| DDX41   | IRP1   | RPS28  |
| DNAJC21 | KIT    | RPS29  |
| EFL1    | NF1    | RPS7   |
| ELANE   | NRAS   | RUNX1  |
| ERCC4   | PALB2  | SBDS   |
| ETV6    | RAD51  | SLX4   |
| FANCA   | RAD51C | SRP54  |
| FANCB   | RFWD3  | SRP72  |
| FANCC   | RPL11  | TCIRG1 |
| FANCD2  | RPL15  | TET2   |
| FANCE   | RPL18  | TSR2   |
| FANCF   | RPL26  | UBE2T  |
| FANCG   | RPL27  | WT1    |
| FANCI   | RPL35  | XRCC2  |
| KMT2A   | RPL35A |        |
| MAD2L2  | RPL5   |        |
